# Supplementary material for: Strong anisotropy of ferroelectricity in lead-free bismuth silicate
Source: Royal Society of Chemistry journal article supplement (doi:10.1039/c5nr03161c), 2015-01-01
Supplement: c5nr03161c1.pdf [file c5nr03161c1.pdf]

Electronic Supplementary Material (ESI) for Nanoscale.  
This journal is © The Royal Society of Chemistry 2015

# **Electronic Supplementary Information for**

## **“Strong anisotropy of ferroelectricity in lead-free bismuth silicate”**

*Daehee Seol,<sup>a,b</sup> Hiroki Taniguchi,<sup>c</sup> Jae-Yeol Hwang,<sup>b,e</sup> Mitsuru Itoh,<sup>d</sup> Hyunjung Shin,<sup>e</sup> Sung Wng Kim,<sup>b,e,\*</sup> and Yunseok Kim<sup>a,b,\*</sup>*

*a School of Advanced Materials Science and Engineering, Sungkyunkwan University (SKKU), Suwon 440-746, Republic of Korea*

*b Center for Integrated Nanostructure Physics, Institute for Basic Science (IBS), Sungkyunkwan University (SKKU), Suwon 440-746, Republic of Korea*

*c Department of Physics, Nagoya University, Nagoya 464-8602, Japan*

*d Materials and Structure Laboratory, Tokyo Institute of Technology, Yokohama 226-8503, Japan*

*e Department of Energy Science, Sungkyunkwan University (SKKU), Suwon 440-746, Republic of Korea*

\* Address correspondence to [kimsunwung@skku.edu](mailto:kimsunwung@skku.edu) and [yunseokkim@skku.edu](mailto:yunseokkim@skku.edu)

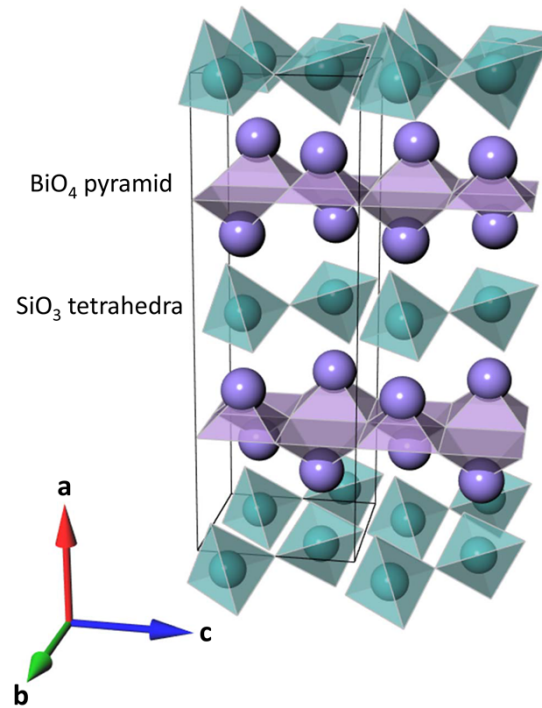

**Figure S1.** Schematic drawing of crystal structure of  $\text{Bi}_2\text{SiO}_5$ .

Schematic drawing of crystal structure of  $\text{Bi}_2\text{SiO}_5$  (BSO) is illustrated in Figure S1. BSO is composed by stacking  $[\text{Bi}_2\text{O}_2]^{2+}$  and  $[\text{SiO}_3]^{2-}$  layers and has strong cleavage plane along the  $a$ -axis.

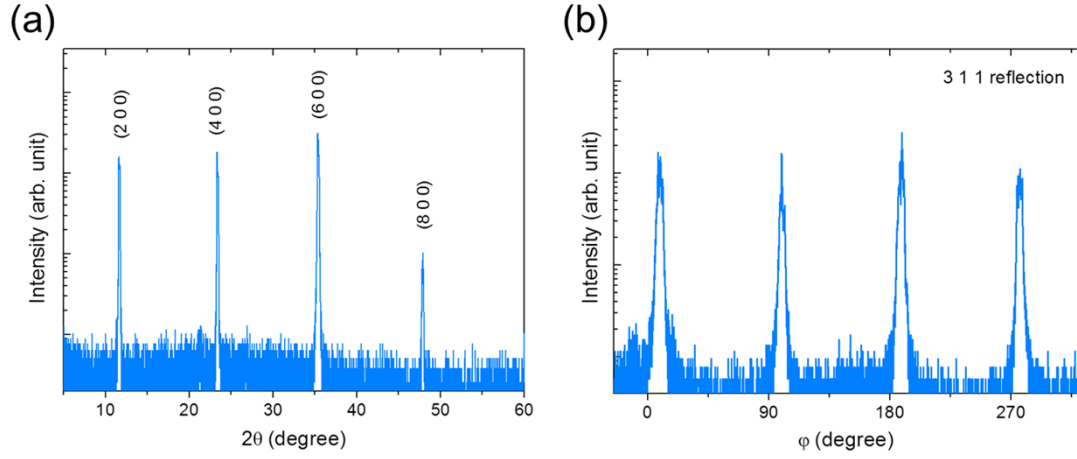

**Figure S2.** (a) XRD pattern of cleaved BSO sample by gonio-scan with Bragg-Brentano geometry. (b)  $\phi$ -scan of 3 1 1 reflection for cleaved BSO sample.

The cross-plane and in-plane orientations of mechanically cleaved BSO samples were characterized by gonio- and  $\phi$ -scans using x-ray diffractometer with monochromatized Cu  $K_{\alpha 1}$  line (Rigaku Smartlab), respectively. In Figure S2(a), cleaved BSO sample showed only ( $h$  0 0) reflection without any secondary phase. The single crystallinity was investigated by  $\phi$ -scan of 3 1 1 reflection for BSO sample. As shown in Figure S2(b), four azimuthal peaks, which are separated by about 90 degrees each other, prove the single crystallinity of BSO sample.
